# Supplementary material for: Ultrasound Neuromodulation: A Review of Results, Mechanisms and Safety
Source: PubMed Central journal article supplement (PMC6996285; doi:10.1016/j.ultrasmedbio.2018.12.015), 2019-07
Supplement: mmc1.pdf [file mmc1.pdf]

# Ultrasound neuromodulation; a review of results, mechanisms and safety: Supplementary Information

J. Blackmore, S. Shrivastava, J. Sallet, C.R. Butler & R.O. Cleveland

November 27, 2018

This document contains the tabulated data extracted from the CNS and PNS ultrasonic neuromodulation studies, respectively. Where possible, parameters were directly taken from the literature and these are marked in the tables in black. If additional parameters could be calculated from the published parameters, this was done and these parameters are marked in red.

The majority of calculations were converting between intensities and pressures. We did this using the following equation assuming a plane time harmonic wave,

$$I = \frac{p^2}{2\rho_0 c_0}, \quad (1)$$

where  $p$  is the pressure amplitude,  $\rho_0$  was taken to be  $1046 \text{ kg/m}^3$  (Hasgall et al., 2015) and  $c_0$  was  $1562 \text{ m/s}$  (Duck, 1990). We also converted between intensities over different time scales (temporal-averaged, burst-averaged and pulse-averaged) using the duty cycle information given in the reference.

Studies have been split into multiple rows where necessary in order to account for different experiments and ultrasound sequences.

If continuous wave ultrasound was used, the burst parameters are undefined and therefore marked with a dash.

## References

Hasgall PA, Di Gennaro F, Baumgartner C, Neufeld E, Gosselin MC, Payne D, Klingensack A, Kuster N. ITIS Database for thermal and electromagnetic parameters of biological tissues. Version 3.0, [www.itis.ethz.ch/database](http://www.itis.ethz.ch/database).

Duck, FA. Physical properties of tissue: A comprehensive reference book. 1990;73–124.

| Study                  | Category | Organism                               | f (MHz)     | SPTA (mW/cm <sup>2</sup> ) | SPBA (W/cm <sup>2</sup> ) | ISPPA (W/cm <sup>2</sup> ) | p (MPa)         | BD (ms)   | BI (g)  | PL (ms)    | PRF (Hz) | BDC (%) | TDC (%) | N        | TL (s)  | MI   | Histology | Damage | Notes                                                                                      |
|------------------------|----------|----------------------------------------|-------------|----------------------------|---------------------------|----------------------------|-----------------|-----------|---------|------------|----------|---------|---------|----------|---------|------|-----------|--------|--------------------------------------------------------------------------------------------|
| Lejon et al., 2018     | H        | Human (MI)                             | 0.5         |                            |                           | 0.44                       | 0.12            | 500       | 8-10    | 0.36       | 1000     | 36      | 300     | 300      | 100     |      |           |        |                                                                                            |
| Lejon et al., 2018     | H        | Human (Thalamus)                       | 0.5         | 2.15                       |                           | 0.44                       | 0.12            | 500       | 8-10    | 0.36       | 1000     | 36      | 300     | 300      | 100     |      |           |        |                                                                                            |
| Lee et al., 2016a      | H        | Human (VI)                             | 0.27        | 0.85-5.8                   |                           | 1.7-11.6                   | 0.24-0.62       | 300       | 2.5, 13 | 0.36       | 1000     | 36      | 50      | 50       | 50      |      |           |        | Dual single-element transducers.                                                           |
| Lee et al., 2016b      | H        | Human (SI, S2)                         | 0.21        | 3.5-4.4                    |                           | 7-8.8                      | 0.48-0.54       | 500       | 7       | 1          | 500      | 50      | 50      | 50       | 50      |      |           |        |                                                                                            |
| Al et al., 2016        | H        | Human (SI)                             | 0.5         | 2.16                       |                           | 6                          | 0.44            | 500       | 12.0-14 | 0.36       | 1000     | 36      | 90      | 90       |         |      |           |        |                                                                                            |
| Lee et al., 2015       | H        | Human (SI)                             | 0.86        | 3                          |                           | 6                          | 0.44            | 500       | 10.0-14 | 0.36       | 1000     | 36      | 50      | 50       |         |      |           |        |                                                                                            |
| Muehle et al., 2014    | H        | Human (SI)                             | 0.25        | 0.25-1.25                  |                           | 0.5-2.5                    | 0.13-0.29       | 300       | 3       | 1          | 500      | 50      | 50      | 50       | 50      |      |           |        |                                                                                            |
| Lejon et al., 2014     | H        | Human (SI)                             | 0.5         | 2.12                       |                           | 5.9                        | 0.44            | 500       | 6       | 0.36       | 1000     | 36      | 120     | 120      |         |      |           |        |                                                                                            |
| Hannaford et al., 2013 | H        | Human (Posterior Frontal Cortex)       | 8           | 152                        |                           | 8.00E-06                   | 5.00E-04        | 500       | 6       | 0.36       | 1000     | 36      | 120     | 120      | 15      | 0.7  |           |        | LOGiGe imaging probe p1, ISPPA estimated from MI value, denoting and accounting for skull. |
| Kubanek et al., 2017   | L        | Monkey (Frontal Eye Field)             | 0.27        |                            |                           |                            |                 | 300       |         |            |          |         |         |          |         |      |           |        |                                                                                            |
| Wanzen et al., 2017    | L        | Monkey (Frontal Eye Field)             | 0.32        |                            |                           | 1.9156                     | 0.24, 0.41      | 100       |         |            |          |         |         | 386, 400 |         |      |           |        |                                                                                            |
| Delpeux et al., 2013   | L        | Monkey (Frontal Eye Field)             | 0.22        |                            |                           | 4                          | 0.35            |           |         |            |          |         |         |          |         |      |           |        |                                                                                            |
| Delpeux et al., 2016   | L        | Pigs (Thalamus)                        | 0.32        |                            |                           | 30                         | 0.99            |           |         | 43.7       | 10       |         |         | 40       | 40      |      |           |        | Assuming ISPPA = ISA                                                                       |
| Delpeux et al., 2016   | L        | Pigs (Thalamus)                        | 0.71        |                            |                           | 30                         | 0.99            |           |         | 43.7       | 10       |         |         | 40       | 40      |      |           |        | Assuming ISPPA = ISA                                                                       |
| Delpeux et al., 2016   | L        | Pigs (Thalamus)                        | 1.145       |                            |                           | 30                         | 0.99            |           |         | 43.7       | 10       |         |         | 40       | 40      |      |           |        | Assuming ISPPA = ISA                                                                       |
| Demélie et al., 2018   | S        | Rat                                    | 0.23        |                            |                           | 4.6                        | 0.38            |           | 3       | 100        |          |         |         | 52       | 52      |      |           |        | Quoted pressures do not correspond with intensities. Assumed quoted intensity correct.     |
| Demélie et al., 2018   | S        | Rat                                    | 0.23        |                            |                           | 2.3-4.6                    | 0.27-0.38       |           | 3       | 100        |          |         |         | 52       | 52      |      |           |        | Quoted pressures do not correspond with intensities. Assumed quoted intensity correct.     |
| Lee et al., 2016       | L        | Sheep (SM1)                            | 0.25        | 1.7-5.9                    |                           | 3.4-11.6                   | 0.34-0.62       | 300       | 5       | 1          | 500      | 50      | 50      | 100      | 100     |      |           |        | Damage >500 times every second at moderate (ISPPA 0.6-1.0 W/cm <sup>2</sup> , MI=0.9-1.2). |
| Fisher et al., 2018    | S        | Mouse (Cortex)                         | 0.25        | 0.85-7.15                  |                           | 0.74-14.3                  | 0.24-0.68       | 300       | 1       | 0.5        | 1500     | 30      | 50      | 100-600  | 100-600 |      |           |        |                                                                                            |
| Han et al., 2017       | S        | Rat (Motor Cortex)                     | 0.35        | 0.4-4.67                   |                           | 1.16-15.35                 | 0.06-0.69       | 66.67     | 2       | 0.23       | 1500     | 34.5    | 1500    | 34.5     | 1500    | 34.5 |           |        |                                                                                            |
| Han et al., 2017       | S        | Rat (Motor Cortex)                     | 0.35        | 0.4-4.67                   |                           | 1.16-15.35                 | 0.06-0.69       | 66.67     | 2       | 0.23       | 1500     | 34.5    | 1500    | 34.5     | 1500    | 34.5 |           |        |                                                                                            |
| Han et al., 2017       | S        | Chimpanzee (Caudate)                   | 0.35        | 0.02                       |                           | 0.02                       | 0.04            | 66.67     | 2       | 0.23       | 1500     | 34.5    | 1500    | 34.5     | 1500    | 34.5 |           |        |                                                                                            |
| Guo et al., 2017       | S        | Guinea Pig (A1, S1)                    | 0.22        |                            |                           | 0.25                       | 0.1             | 300       |         | 0.10       |          |         |         |          |         |      |           |        | A1 activation.                                                                             |
| Guo et al., 2017       | S        | Guinea Pig (A1, S1)                    | 0.22        |                            |                           | 1.22                       | 0.2             | 10        |         | 0.1-10     | 10-1500  |         |         |          |         |      |           |        | First spike latency experiment.                                                            |
| Guo et al., 2017       | S        | Guinea Pig (A1, S1)                    | 0.22        |                            |                           | 1.22                       | 0.2             | 10        |         | 0.1-10     | 10-1500  |         |         |          |         |      |           |        | Auditory nerve transection.                                                                |
| Guo et al., 2017       | S        | Guinea Pig (A1, S1)                    | 0.22        |                            |                           | 1.22                       | 0.2             | 10        |         | 0.1-10     | 10-1500  |         |         |          |         |      |           |        | Indirect somatosensory activation.                                                         |
| Guo et al., 2017       | S        | Guinea Pig (A1, S1)                    | 0.22        |                            |                           | 1.22                       | 0.2             | 10        |         | 0.1-10     | 10-1500  |         |         |          |         |      |           |        | Cochlear fluid removed.                                                                    |
| Shao et al., 2017      | S        | Mouse (Visual Cortex)                  | 0.5         | 0.039-4.2                  |                           | 1.81                       | 0.68            | 80        | 0.2     | 0.2        | 1500     | 30      | 30      | 30       | 30      |      |           |        | USIECS interaction, ISPPA calculated from quoted table.                                    |
| Shao et al., 2017      | S        | Rat (Motor Cortex)                     | 0.2         | 4500                       |                           | 30                         | 60 (SPTP = 100) | 1.81      | 3       | 10         | 0.5      | 1000    | 50      | 100      | 50      | 3.1  |           |        | EMG latency, ISPPA calculated from quoted table.                                           |
| Shao et al., 2017      | S        | Rat (Motor Cortex)                     | 0.25        | 9                          |                           | 30                         | 60 (SPTP = 100) | 1.81      | 3       | 10         | 0.5      | 1000    | 50      | 100      | 50      | 3.1  |           |        | EMG latency, ISPPA calculated from quoted table.                                           |
| Lee et al., 2017       | S        | Rat                                    | 0.23        |                            |                           | 0.5-1.1                    | 0.1-1.1         |           |         |            |          |         |         |          |         |      |           |        |                                                                                            |
| Li et al., 2016        | S        | Mouse (Motor Cortex)                   | 1           | 130-230                    |                           | 2.3                        | 4.6             | 300       | 3       | 0.5        | 1000     | 50      | 5       | 60       | 60      |      |           |        |                                                                                            |
| Li et al., 2016        | S        | Mouse (Motor Cortex)                   | 5           | 130-230                    |                           | 2.3                        | 4.6             | 300       | 3       | 0.5        | 1000     | 50      | 5       | 60       | 60      |      |           |        |                                                                                            |
| Kamruza et al., 2016   | S        | Mouse (Motor Cortex & Cognitive Areas) | 1.9         | 44-1-275.4                 |                           | 22-137.2                   | 1.2-3           | 1000      | 2       | 1          | 1000     | 50      | 5       | 10       | 20      |      |           |        |                                                                                            |
| Davies et al., 2016    | S        | Rat                                    | 1.4         | 1.4                        |                           | 6.8                        | 0.42            | 1000      | 2       | 0.2        | 1050     | 21      | 100     | 200      | 200     |      |           |        |                                                                                            |
| Yu et al., 2016        | S        | Rat                                    | 0.5         | 0.1-0.6 mW/cm <sup>2</sup> |                           | 0.7-4.6 mW/cm <sup>2</sup> | 18.3-45.9 Hz    | 5-200     | 3       | 0.07       | 2000     | 14      | 14      | 100      | 200     |      |           |        |                                                                                            |
| Moore et al., 2015     | S        | Mouse                                  | 0.35        |                            |                           | 0.07-0.23                  | 0.08            | 10        | 0.14    | 0.214      | 2000     | 42.8    |         | 10 min   |         |      |           |        |                                                                                            |
| Moore et al., 2015     | S        | Mouse (Motor Cortex)                   | 0.3         | 0.3                        |                           | 0.1-0.5                    | 0.06-0.34       |           |         | 66.7-133.3 |          |         |         |          |         |      |           |        |                                                                                            |
| Moore et al., 2015     | S        | Mouse (Motor Cortex)                   | 0.6         | 0.6                        |                           | 0.1-0.5                    | 0.06-0.34       |           |         | 66.7-133.3 |          |         |         |          |         |      |           |        |                                                                                            |
| Moore et al., 2015     | S        | Mouse (Motor Cortex)                   | 1.4         | 1.4                        |                           | 0.02-9.4                   | 0.02-9.4        |           |         | 80         |          |         |         |          |         |      |           |        |                                                                                            |
| Moore et al., 2015     | S        | Mouse (Motor Cortex)                   | 1.4         | 1.4                        |                           | 0.02-9.4                   | 0.02-9.4        |           |         | 80         |          |         |         |          |         |      |           |        |                                                                                            |
| Moore et al., 2015     | S        | Mouse (Motor Cortex)                   | 2.9         | 2.9                        |                           | 0.04-3.1                   | 0.04-3.1        |           |         | 80         |          |         |         |          |         |      |           |        |                                                                                            |
| Moore et al., 2015     | S        | Mouse (Motor Cortex)                   | 2.9         | 2.9                        |                           | 0.04-3.1                   | 0.04-3.1        |           |         | 80         |          |         |         |          |         |      |           |        |                                                                                            |
| Moore et al., 2015     | S        | Mouse (Motor Cortex)                   | 2.9         | 2.9                        |                           | 0.04-3.1                   | 0.04-3.1        |           |         | 80         |          |         |         |          |         |      |           |        |                                                                                            |
| Kim et al., 2015       | S        | Rat (Visual Cortex)                    | 0.35        | 50-250                     |                           | 1-5                        | 0.4             |           |         | 0.5        | 20-166   |         | 1-8.3   | 150      |         |      |           |        |                                                                                            |
| Kim et al., 2014       | S        | Mouse (Motor Cortex)                   | 0.35        |                            |                           | 2.45-11.2                  | 4.91-22.4       | 0.40-81   | 200-400 | 2          | 0.25-5   | 60-2800 | 30-70   |          | 1.38    |      |           |        |                                                                                            |
| Kim et al., 2014       | S        | Rat (Motor Cortex)                     | 0.35        |                            |                           | 7.73                       | 0.5             | 150       |         | 150        |          |         |         |          |         |      |           |        |                                                                                            |
| Kim et al., 2014       | S        | Rat (Motor Cortex)                     | 0.65        |                            |                           | 3.5-5                      | 7-10            | 0.48-0.57 | 300     | 0.5-5      | 100-1000 | 50      | 50      |          |         |      |           |        |                                                                                            |
| Kim et al., 2014       | S        | Rat (Thalamus)                         | 0.35        | 3.5-4.5                    |                           | 7-9                        | 0.48-0.54       | 300       | 2       | 0.5        | 1000     | 50      | 50      | 40 min   | 40 min  |      |           |        | PL and PDC variation.                                                                      |
| Kim et al., 2014       | S        | Rat (Motor Cortex)                     | 0.5         | 0.15-5.25                  |                           | 0.5-17.5                   | 0.19-0.76       | 58.7      | 1       | 0.2        | 1500     | 30      | 10      | 10       | 10      |      |           |        | Planar transducer.                                                                         |
| Kim et al., 2014       | S        | Rat (Motor Cortex)                     | 1.75 & 2.25 | 1-8                        |                           | 3.3-26.7                   | 0.18-0.93       | 14.7-58.7 | 1       | 0.1-0.2    | 1500     | 15-30   | 10      | 10       | 10      |      |           |        | Planar transducer.                                                                         |
| Younan et al., 2013    | S        | Rat (Motor Cortex)                     | 0.32        |                            |                           | 17.5                       | 1.2             | 250       | 0.23    | 0.23       | 2000     | 50      | 50      | 2.2      | 2.2     |      |           |        | mFU: two frequencies separated by 500 kHz.                                                 |
| Younan et al., 2013    | S        | Mouse (Motor Cortex)                   | 0.5         |                            |                           | 0.16-8                     | 0.4-0.51        |           | >5      | 80         |          |         |         |          |         |      |           |        | Incorporates correction factor for standing waves.                                         |
| Younan et al., 2013    | S        | Mouse (Motor Cortex)                   | 0.5         |                            |                           | 0.16-8                     | 0.4-0.51        |           | >5      | 80         |          |         |         |          |         |      |           |        | Acoustic intensity sweep.                                                                  |
| Younan et al., 2013    | S        | Mouse (Motor Cortex)                   | 0.5         |                            |                           | 0.16-8                     | 0.4-0.51        |           | >5      | 80         |          |         |         |          |         |      |           |        | Sonication duration.                                                                       |
| Younan et al., 2013    | S        | Mouse (Motor Cortex)                   | 0.5         |                            |                           | 0.16-8                     | 0.4-0.51        |           | >5      | 80         |          |         |         |          |         |      |           |        | Frequency sweep.                                                                           |
| Younan et al., 2013    | S        | Mouse (Motor Cortex)                   | 0.5         |                            |                           | 0.16-8                     | 0.4-0.51        |           | >5      | 80         |          |         |         |          |         |      |           |        | Pulsed v. CW.                                                                              |
| Younan et al., 2013    | S        | Mouse (Motor Cortex)                   | 0.5         |                            |                           | 0.16-8                     | 0.4-0.51        |           | >5      | 80         |          |         |         |          |         |      |           |        | Pulsed.                                                                                    |
| Younan et al., 2013    | S        | Mouse (Motor Cortex)                   | 0.5         |                            |                           | 0.16-8                     | 0.4-0.51        |           | >5      | 80         |          |         |         |          |         |      |           |        | Full CW parameter sweep.                                                                   |
| Yang et al., 2012      | S        | Rat (Thalamus)                         | 0.65        | 175                        |                           | 3.5                        | 0.35            |           |         | 0.5        | 100      |         |         | 20 min   |         |      |           |        |                                                                                            |
| Yang et al., 2012      | S        | Rat (Thalamus)                         | 0.65        | 175                        |                           | 3.5                        | 0.35            |           |         | 0.5        | 100      |         |         | 20 min   |         |      |           |        |                                                                                            |
| Yoo et al., 2011a      | S        | Rat (Somatomotor & Visual Areas)       | 0.69        |                            |                           | 1.8-6.3                    | 3.3-12.6        | 0.5-2     |         | 0.65-50    | 10-1000  | 50      |         |          |         |      |           |        |                                                                                            |
| Yoo et al., 2011a      | S        | Rat (Thalamus)                         | 0.69        |                            |                           | 2.6                        | 0.27            |           |         | 0.5        | 100      |         |         | 20 min   |         |      |           |        |                                                                                            |
| Yoo et al., 2011a      | S        | Rat (Thalamus)                         | 0.69        |                            |                           | 2.6                        | 0.27            |           |         | 0.5        | 100      |         |         | 20 min   |         |      |           |        |                                                                                            |
| Yoo et al., 2011a      | S        | Rat (Thalamus)                         | 0.69        |                            |                           | 2.6                        | 0.27            |           |         | 0.5        | 100      |         |         | 20 min   |         |      |           |        |                                                                                            |
| Yoo et al., 2011a      | S        | Rat (Thalamus)                         | 0.69        |                            |                           | 2.6                        | 0.27            |           |         | 0.5        | 100      |         |         | 20 min   |         |      |           |        |                                                                                            |
| Yoo et al., 2011a      | S        | Rat (Thalamus)                         | 0.69        |                            |                           | 2.6                        | 0.27            |           |         | 0.5        | 100      |         |         | 20 min   |         |      |           |        |                                                                                            |
| Yoo et al., 2011a      | S        | Rat (Thalamus)                         | 0.69        |                            |                           | 2.6                        | 0.27            |           |         | 0.5        | 100      |         |         | 20 min   |         |      |           |        |                                                                                            |
| Yoo et al., 2011a      | S        | Rat (Thalamus)                         | 0.69        |                            |                           | 2.6                        | 0.27            |           |         | 0.5        | 100      |         |         | 20 min   |         |      |           |        |                                                                                            |
| Yoo et al., 2011a      | S        | Rat (Thalamus)                         | 0.69        |                            |                           | 2.6                        | 0.27            |           |         | 0.5        | 100      |         |         | 20 min   |         |      |           |        |                                                                                            |
| Yoo et al., 2011a      | S        | Rat (Thalamus)                         | 0.69        |                            |                           | 2.6                        | 0.27            |           |         | 0.5        | 100      |         |         | 20 min   |         |      |           |        |                                                                                            |
| Yoo et al., 2011a      | S        | Rat (Thalamus)                         | 0.69        |                            |                           | 2.6                        | 0.27            |           |         | 0.5        | 100      |         |         | 20 min   |         |      |           |        |                                                                                            |
| Yoo et al., 2011a      | S        | Rat                                    |             |                            |                           |                            |                 |           |         |            |          |         |         |          |         |      |           |        |                                                                                            |

| S                      | Cell (LGN)                             | 43       | 50-90         | 1.71      | 200     | 20-120        | √             | x       | No histologically observed legions.                          |
|------------------------|----------------------------------------|----------|---------------|-----------|---------|---------------|---------------|---------|--------------------------------------------------------------|
| Fry et al., 1998       | Cat LGN                                | 43       | 50-90         | 1.71      | 200     | 20-120        | √             | x       | No histologically observed legions.                          |
| Prato et al., 2018     | Cell cultures                          | 10       | 11-30.6       | 0.641.0   | 200     | 50            |               |         |                                                              |
| Kubarek et al., 2017   | C. Elegans                             | 5.5-15.4 | 11-30.6       | 0.641.0   | 200     | 50            |               |         |                                                              |
| Menz et al., 2017      | Isolated Salamander Retina             | 43       | 0-120         | 0-1.98    | 1-1000  |               |               |         |                                                              |
|                        | Isolated Salamander Retina             | 15       | 0-120         | 0-1.98    | 1-1000  |               |               |         |                                                              |
|                        | Isolated Salamander Retina             | 0.5      | 1.6           | 0.23      | 100     |               |               |         |                                                              |
| Kim et al., 2017       | Hippocampal slice                      |          | 780 uW/cm2    | 11.52 kPa | 2       | 2.087 us      | 1.16 KHz      | 3 min   | Preliminary tests with additional high frequency modulation. |
| Menz et al., 2013      | Isolated salamander retina             | 43       | 30            | 1000      | 2       | 1000          | 10 Hz - 1 MHz |         |                                                              |
|                        | Isolated salamander retina             | 0.5      | 0.05-60       | 0.04-1.4  | 2       | 1000          | 0.5           | 745 min |                                                              |
| Choi et al., 2013      | Hippocampal neurons                    | 0.5      | 16.1-62.8     | 0.8-2.0   | 5000    | 6             | 0.02          | 10-100  | 0.02-0.2                                                     |
|                        | Hippocampal slice                      | 0.44     | 0.023         | 0.31      | 22.7 us | 0-100 (sweep) | 5             |         | LILFU-1.                                                     |
|                        | Hippocampal slice                      | 0.44     | 0.023         | 0.31      | 22.7 us | 10            | 0.5           |         | Patch clamp recordings                                       |
|                        | Hippocampal slice, ex-vivo mouse brain | 0.44     | 0.023         | 0.31      | 0.18    | 10            | 0.3           |         | Transients.                                                  |
|                        | Hippocampal slice                      | 0.44     | 0.023         | 0.31      | 22.7 us | 0.002         | 36-48 h       |         | Membrane integrity test, LILFU-1 every 8 min for 36-48 h.    |
|                        | Hippocampal slice                      | 0.67     |               |           | 74.5    | 10            | 0.57          |         | Synaptic vesicle release.                                    |
| Khrachche et al., 2008 | Hippocampal slice                      | 7.75     | 50-150 (1.1P) | 1.28-2.21 | 2       | 2             | 0.55          |         |                                                              |
| Bachold et al., 1998   | Hippocampal slice                      | 0.5      | 140-110       | 1.89      | 100 ns  | 200 KHz       | 5 min         |         | Assuming quoted ISFTA = ISPPA                                |
| Finnald et al., 1991   | Hippocampal slice                      | 0.75     | 80            | 1.62      | 6 us    | 150 KHz       | 2-15 min      |         | Assuming quoted ISFTA = ISPPA                                |

| Study                  | Category | Organism                 | f (MHz) | I_SPTA (mW/cm2) | I_SFBA (W/cm2)  | I_SPPA (W/cm2) | p (MPa)     | BD (ms)  | BI (s)    | PL (ms)  | PRF (Hz)  | BDC (%) | TDC (%)   | N        | TL (s)     | MI        | Histology | Damage | Notes                                    |                                        |
|------------------------|----------|--------------------------|---------|-----------------|-----------------|----------------|-------------|----------|-----------|----------|-----------|---------|-----------|----------|------------|-----------|-----------|--------|------------------------------------------|----------------------------------------|
| Lee et al., 2014       | H        | Human (Finger tip)       | 0.35    | 3-100           | 0.003-0.1       | 0.3-10         | 0.118-1.148 | 10 s     | 0.1-1     | 10-100   | 10-100    | 1       | 0.13-0.71 | 1        | 0.1-1      | 0.1-0.97  | x         |        | Pain thresholds                          |                                        |
| Legon et al., 2012     | H        | Human (Finger tip)       | 0.35    | 3-100           | 0.003-0.1       | 0.3-10         | 0.21-1.145  | 10 s     | 0.1-1     | 10-100   | 10-100    | 1       |           | 1        | 0.1-1      | 0.13-0.71 | x         |        | Pain thresholds                          |                                        |
| Dickey et al., 2012    | H        | Human (Finger tip)       | 1.117   | -               | 11.8            | 84.3           | 1.66        | 500      | 12        | 2        | 70        | 14      |           | 3x50     |            |           |           |        |                                          |                                        |
| Gavrilov et al., 1977a | H        | Human (Hand, forearm)    | 0.48    | -               | 54.8            | 54.8           | 1.34        | 1000     | 12        | 10       | 100       | 100     |           | 3x50     |            |           |           |        |                                          |                                        |
| Downs et al., 2018     | S        | Mouse (Sciatic Nerve)    | 3.57    | 348-994         | 207-994         | 2.6-5.7        | 0.8-10.5    | 1000     | 35-100    | 1000     | 1000      | 35-100  |           |          |            |           |           |        |                                          | Successful parameters for EMG activity |
| Casella et al., 2017   | S        | Mouse (Sciatic Nerve)    | 3.57    | 42.7-155        | 122-442         | 2-3.8          | 1           | 1000     | 95        | 1000     | 1000      | 90      |           |          |            |           |           |        |                                          | Positive control                       |
| Ni et al., 2016        | S        | Rat (Micturition Reflex) | 0.25    | 2.1             | 28              | 0.95           | 300         | 2        | 0.252     | 2000     | 2000      |         |           | 5-15 min |            |           |           |        |                                          |                                        |
| Juan et al., 2014      | S        | Rat (Vagus Nerve)        | 1.1     | 0.2             | 13.6-93.4       | 74.8-102.8     | 1.83        | 15 s     | -         | 200-1000 | 18.2-90.9 |         |           | 1        | 1 min/dsly | 1.43-1.67 |           |        |                                          |                                        |
| Tych et al., 2013      | S        | Rat (Sciatic Nerve)      | 1.15    | -               | 50-283          | 3.04           | -           | 200      | -         | 200      | 200       |         |           |          |            |           |           |        |                                          |                                        |
| Kim et al., 2012       | S        | Rat (Abducens Nerve)     | 0.35    | 4.6             | 8.6             | 0.53           | 200         | 1        | 0.36      | 1500     | 1500      | 54      |           | 10       |            |           |           |        | 8.6W/cm2 min for response. No responses. |                                        |
| Foley et al., 2008     | S        | Rat (Sciatic Nerve)      | 5.7     | 0.27-10.8       | 0.5-20          | 0.8            | 200         | 1        | 0.36      | 1500     | 1500      | 54      |           | 10       |            |           |           |        |                                          |                                        |
| Ellisman et al., 1987  | S        | Rat (Sciatic Nerve)      | 5.7     | -               | 2255-7890       | 16.1           | -           | 5 s      | -         | 5 s      | 5 s       |         |           |          |            |           |           |        |                                          |                                        |
| Gavrilov et al., 1977b | S        | Rat (Dorsal Nerve Root)  | 2.4     | -               | 1.9 (ISPTP=8.7) | 0.53           | -           | 0.1      | -         | 0.1      | -         | -       |           |          |            |           |           |        | Nerves in developing myelination stage   |                                        |
| Lele et al., 1963      | S        | Earthworm (Giant Axon)   | 0.6     | -               | 41              | 1.16           | -           | 1        | 500       | 1        | 500       |         |           |          |            |           |           |        |                                          |                                        |
| Young & Henneman, 1961 | S        | Earthworm (Giant Axon)   | 0.9     | -               | 139.2           | 2.13           | -           | 3        | 1400-2000 | 3        | 1400-2000 |         |           |          |            |           |           |        |                                          |                                        |
| Wahab et al., 2012     | S        | Cat (Saphenous Nerve)    | 2.7     | -               | 420             | 3.7            | -           | 100-2000 | -         | 100-2000 | -         |         |           |          |            |           |           |        |                                          |                                        |
| Wright et al., 2017    | I        | Crab Leg Nerve Axon      | 0.67    | 10-84.5         | 20-169          | 1.8-2.4        | 8           | 15-75    | 50 us     | 100      | 100       | 0.5     |           |          |            |           |           |        |                                          |                                        |
| Colucci et al., 2009   | I        | Bullfrog (Sciatic Nerve) | 1.986   | 115-281         | 230-562         | 2.9-4.7        | 8           | 30 s     | 1.5       | 1-10     | 10-20     |         |           |          |            |           |           |        |                                          |                                        |
| Tsui et al., 2005      | I        | Bullfrog (Sciatic Nerve) | 3.5     | 84.5            | 17-475          | 0.7-4.2        | 300         | 1.5      | 1-10      | 10-20    | 10-20     |         |           |          |            |           |           |        |                                          |                                        |
| Mihran et al., 1990    | I        | Frog (Sciatic Nerve)     | 4       | -               | 1-3 W           | 0-1.14         | -           | 5 min    | -         | 5 min    | -         |         |           |          |            |           |           |        |                                          |                                        |
| Fry et al., 1950       | I        | Crayfish (Ventral Nerve) | 0.98    | 35              | 1.07            | 2.8-43.5       | 0.5         | 0.5      | 0.5       | 0.5      | 0.5       |         |           |          |            |           |           |        | Damage at higher intensities             |                                        |
